# Supplementary material for: Comprehensive Analysis of DNA Methylation and Transcriptome to Identify PD-1-Negative Prognostic Methylated Signature in Endometrial Carcinoma
Source: Hindawi journal article supplement (doi:10.1155/2022/3085289), 2022-05-18

A

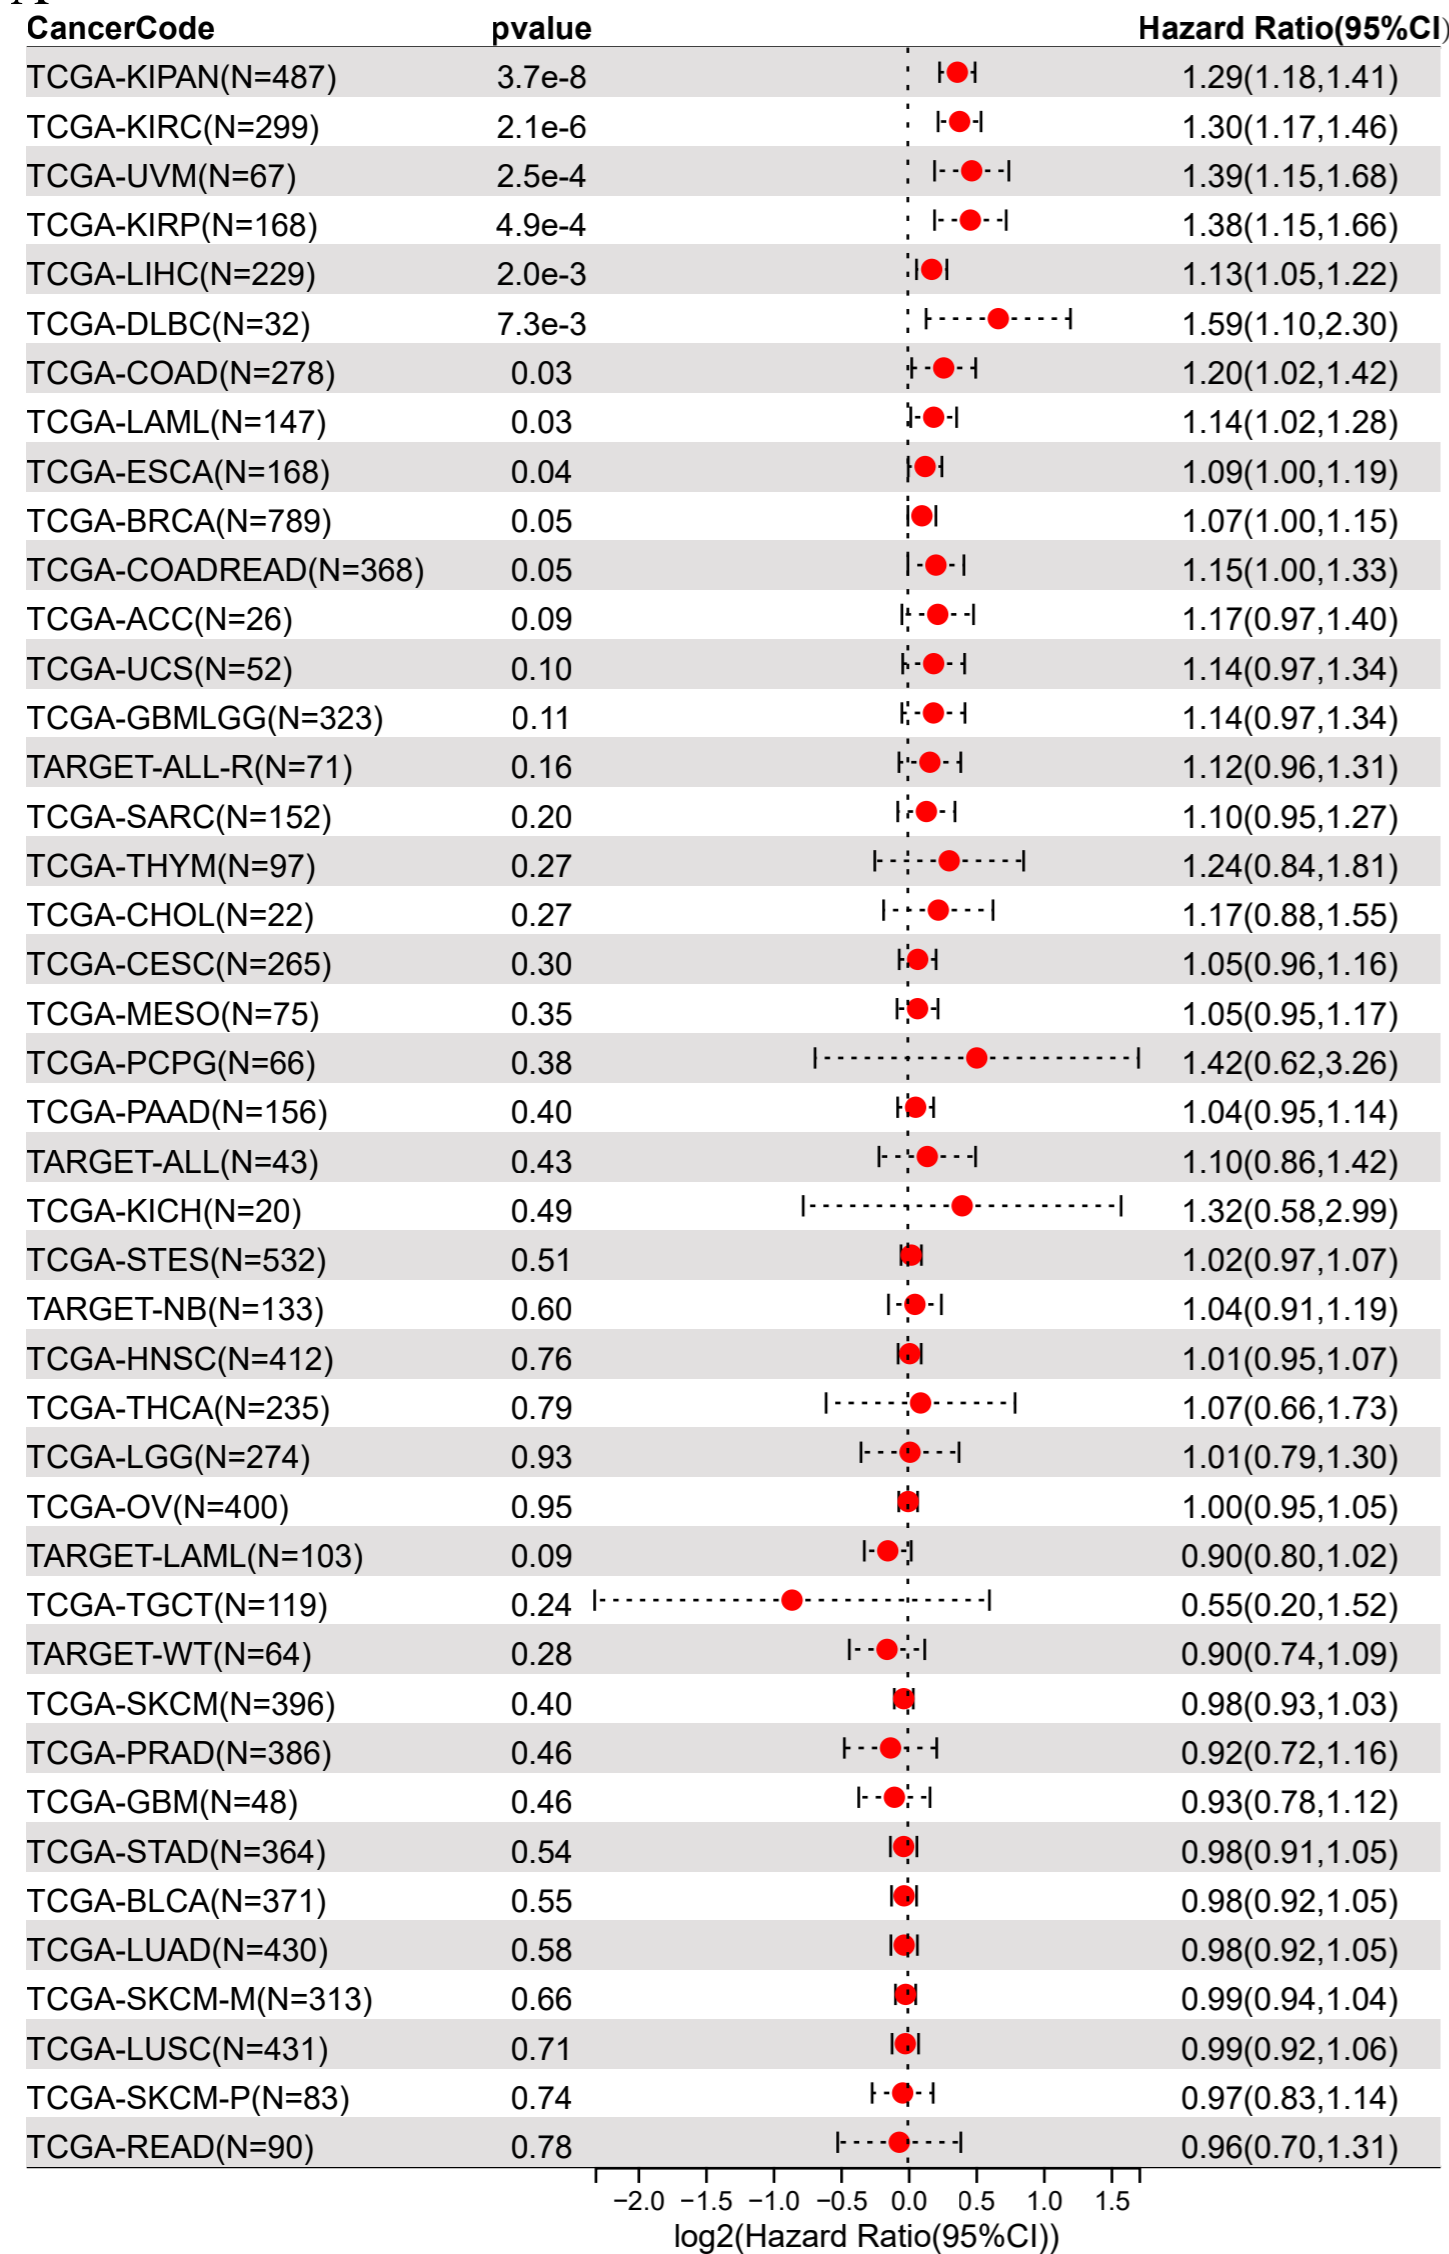

B

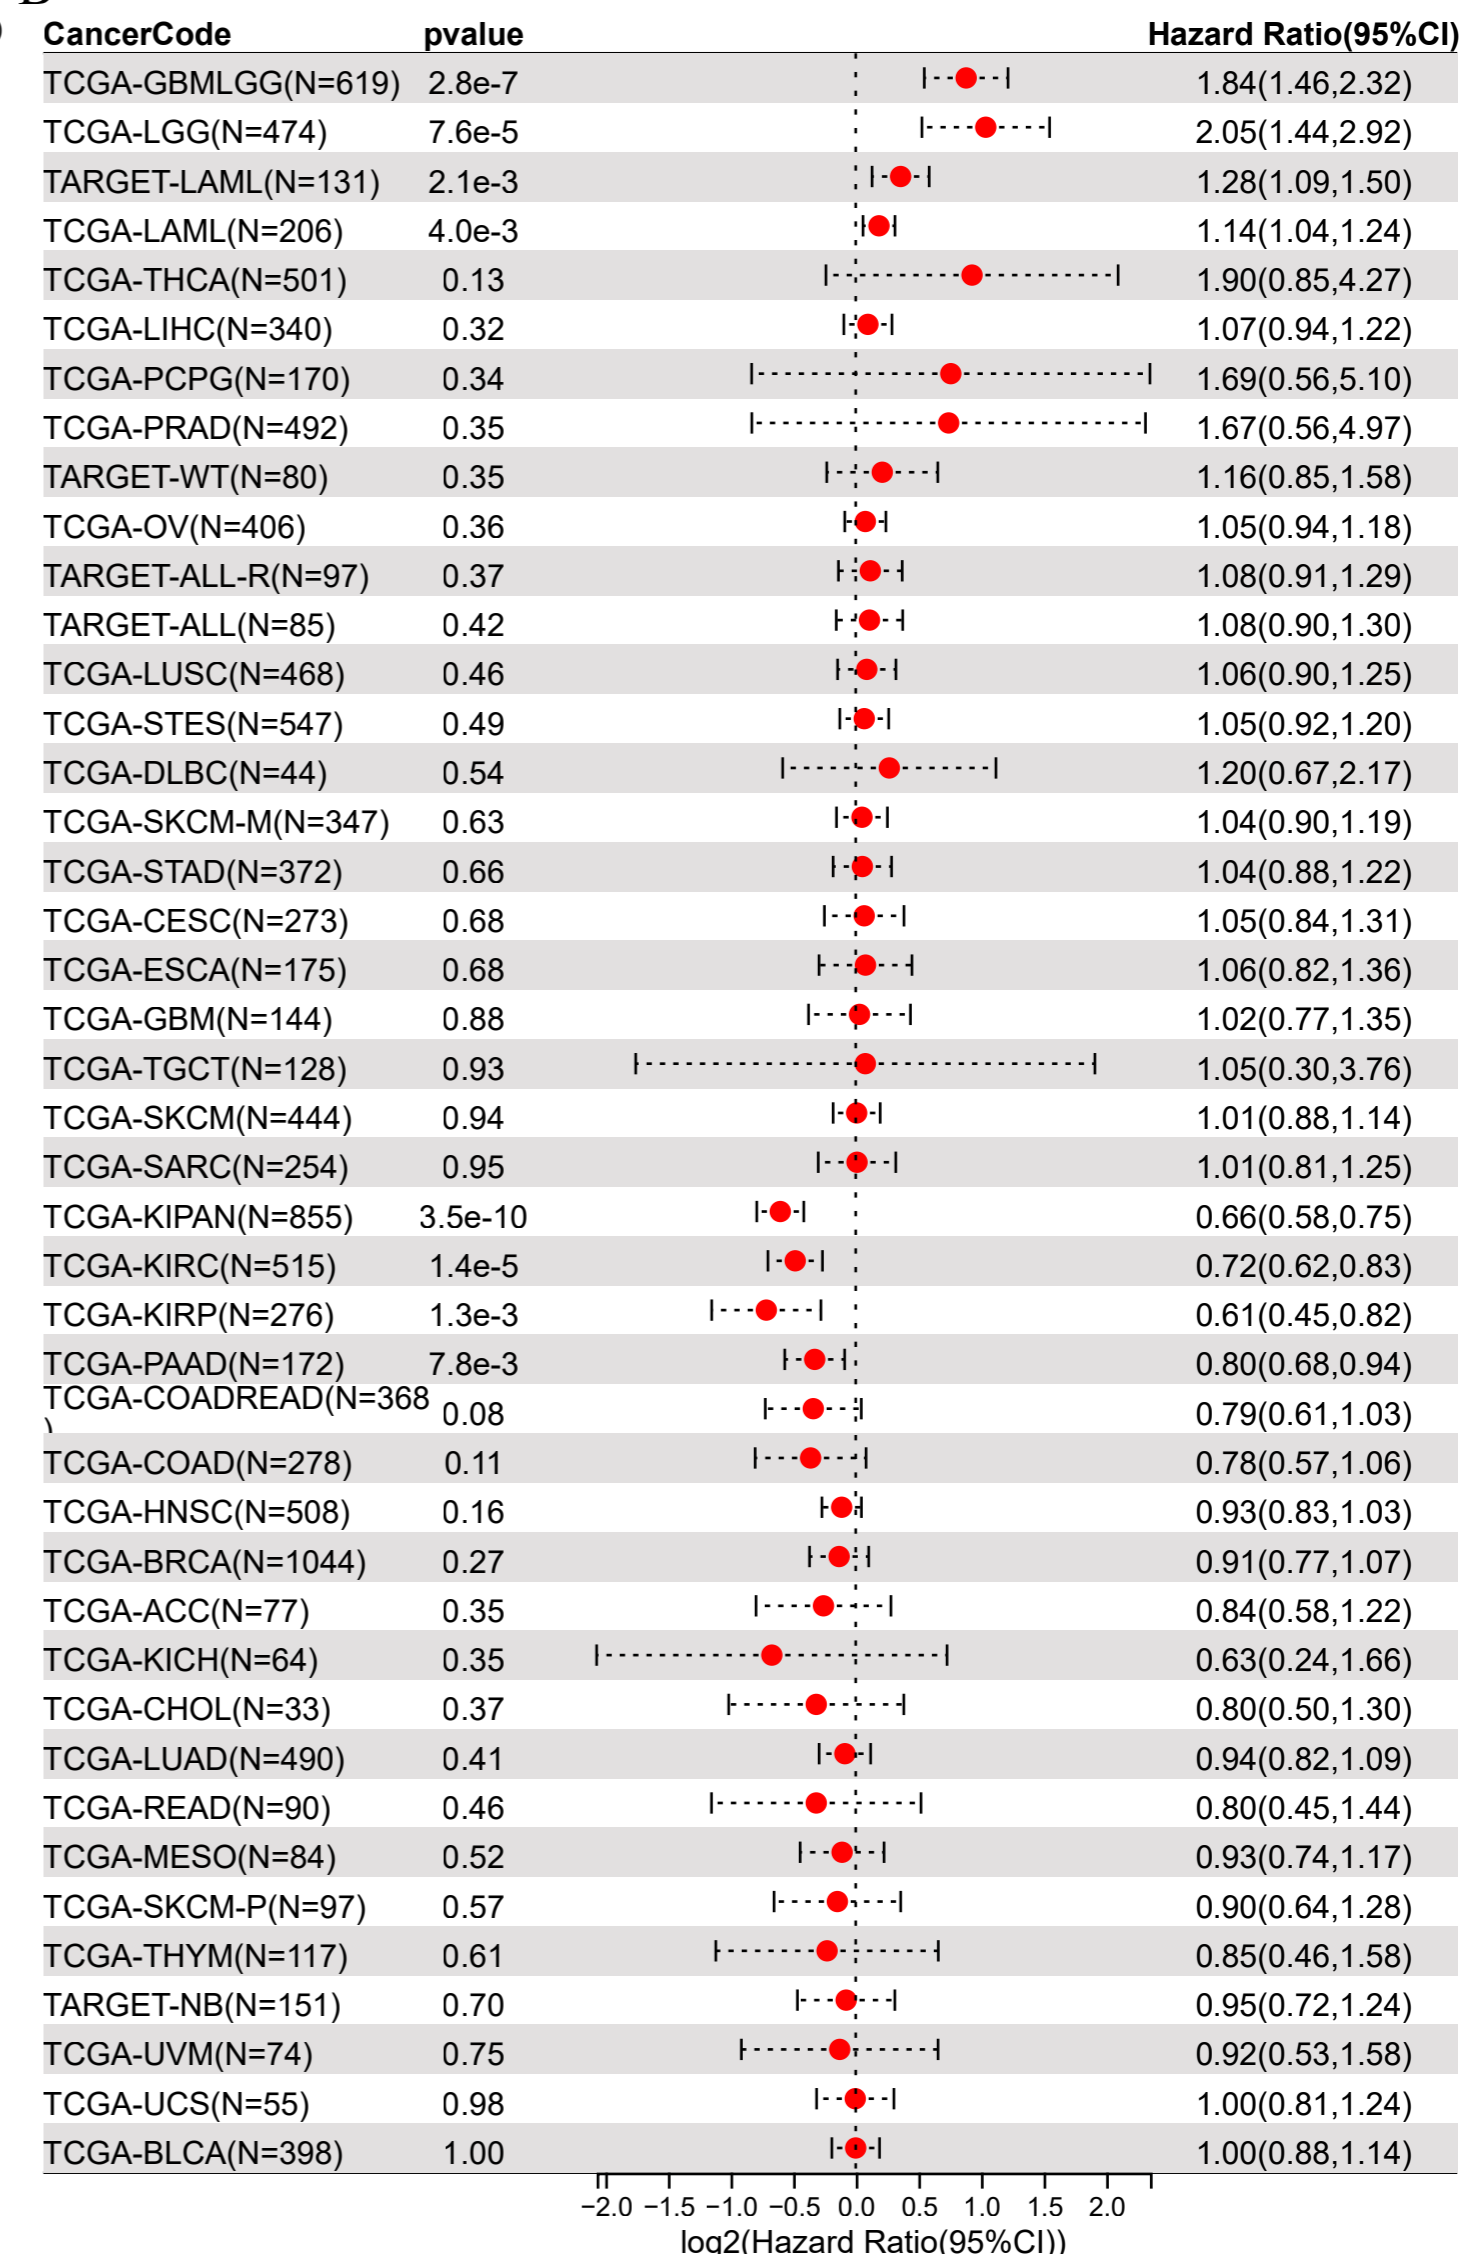

Supplement: f2 [file 3085289.f2.pdf]
